# Supplementary material for: MPP1 as a Factor Regulating Phase Separation in Giant Plasma Membrane-Derived Vesicles
Source: PubMed Central journal article supplement — Biophys J. 2015 May 5;108(9):2201–11. doi: 10.1016/j.bpj.2015.03.017 (PMC4423064; doi:10.1016/j.bpj.2015.03.017), 2015-05-05
Supplement: mmc1.pdf [file mmc1.pdf]

## Membrane Palmitoylated Protein 1 (MPP1) acts as a tuning factor regulating phase separation abilities of Giant Plasma Membrane-derived Vesicles.

Joanna Podkalicka<sup>1,4</sup>, Agnieszka Biernatowska<sup>1</sup>, Michał Majkowski<sup>1</sup>, Michał Grzybek<sup>2,3</sup> and Aleksander F. Sikorski<sup>1\*</sup>

<sup>1</sup> Laboratory of Cytobiochemistry, Faculty of Biotechnology, University of Wrocław, F. Joliot-Curie 14a, 50-383 Wrocław, Poland,

<sup>2</sup> Paul Langerhans Institute Dresden of the Helmholtz Centre Munich at the University Clinic Carl Gustav Carus, TU Dresden, Fetscher Str. 74, 01307 Dresden, Germany

<sup>3</sup> German Center for Diabetes Research (DZD), Ingolstädter Landstraße 1, 85764 Neuherberg, Germany

<sup>4</sup> Max Planck Institute of Molecular Cell Biology and Genetics, Pfotenhauerstr. 108, 01307 Dresden, Germany

### Supporting material

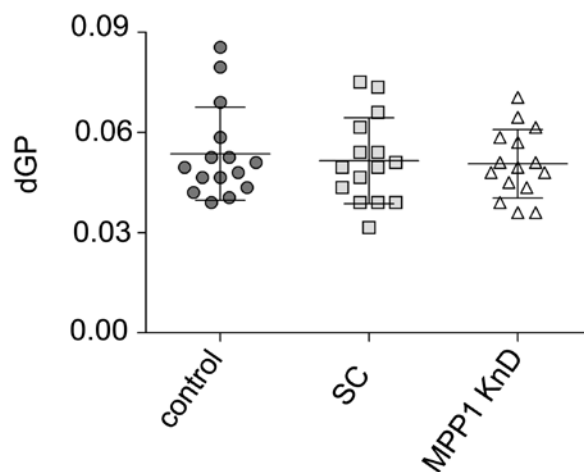

**Fig. S1.  $\Delta GP$  is constant for all isolated GPMVs.** Quantitative analysis of  $\Delta GP$  distribution in GPMVs obtained from MPP1-KnD and control cells shows no significant difference in the absence of MPP1. Each point is representative of >40 vesicles per cell-type.

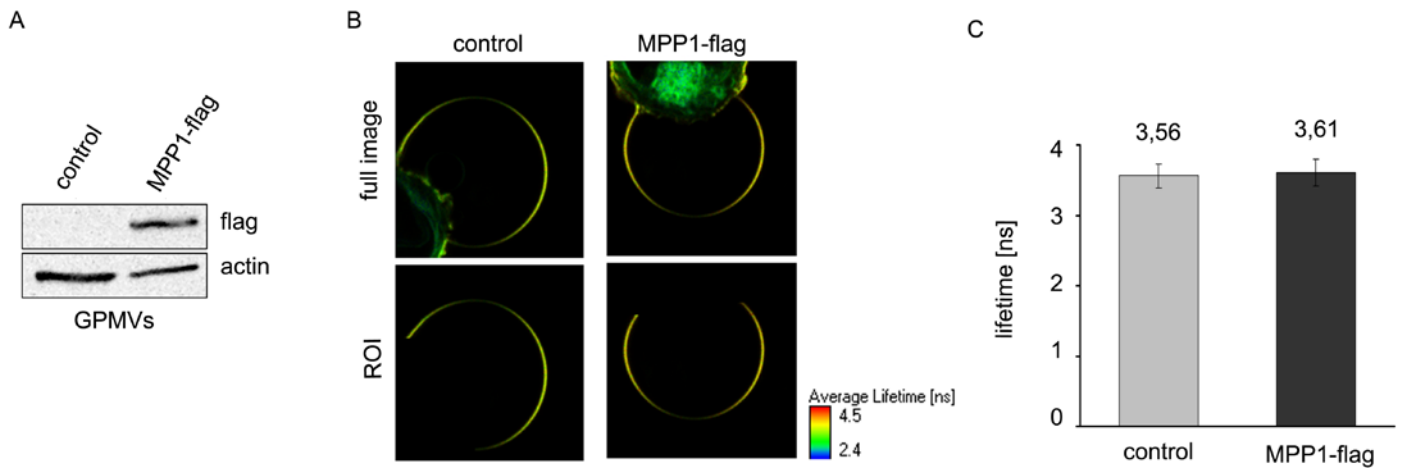

**Fig. S2. MPP1 overexpression does not increase membrane order of GPMVs isolated from HEL cells. (A)** Western Blot analysis of MPP1-flag expression level in GPMVs derived from HEL cells. **(B)** Representative FLIM images of di-4 stained GPMVs isolated from control and MPP1-flag transfected cells (the longer the fluorescence lifetime values, the more ordered the membrane; all images taken at 23°C). **(C)** Mean fluorescence-lifetime values averaged of >15 vesicles per cell type. ROI – region of interest.

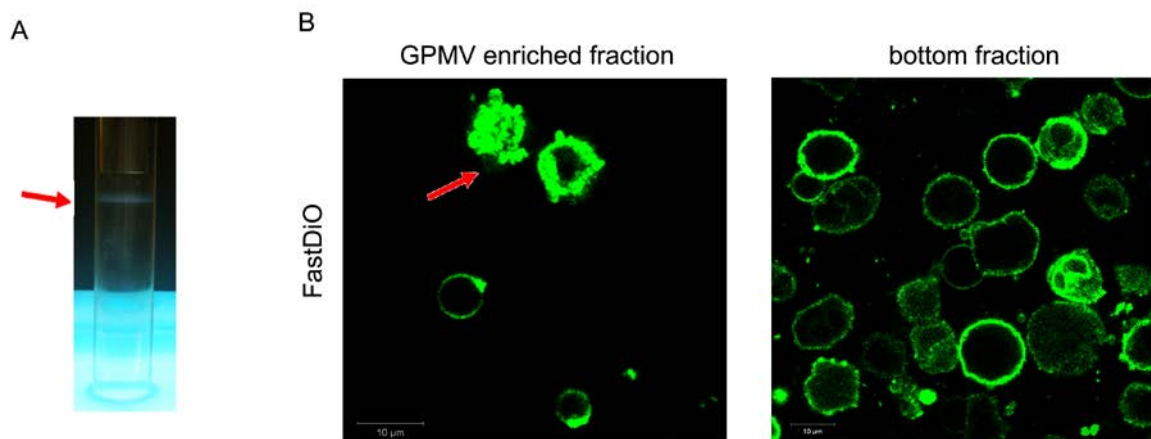

**Fig. S3. GPMV enriched fraction contains also other membranes. (A)** GPMV enriched fraction after gradient separation. **(B)** Representative images of Fast-DiO stained membranes. Within GPMV-enriched fraction cell debris are detected. Bottom fraction contains predominantly cells but some of retaining GPMVs are also observed.
